# Supplementary material for: Potential Role of Rhizobacteria Isolated from Citrus Rhizosphere for Biological Control of Citrus Dry Root Rot
Source: MDPI journal article supplement (doi:10.3390/plants10050872), 2021-04-26
Supplement: s1 [file s1]

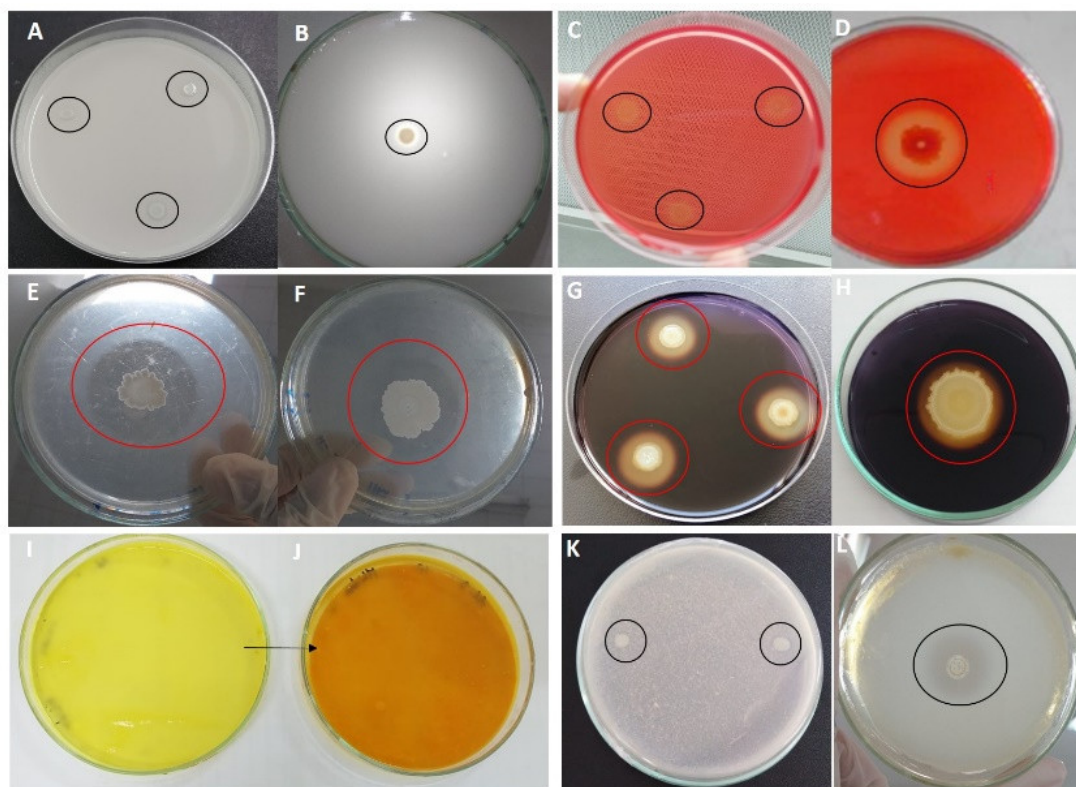

**Figure S1.** Detection of various enzymatic and antagonistic traits of representative bacterial isolates. A-B: Phosphate tricalcium solubilization, C-D: Cellulase activity, E-F: Protease activity, G-H: Amylase activity, I: HCN production, K: Chitinase activity and H: colloidal chitin degradation.

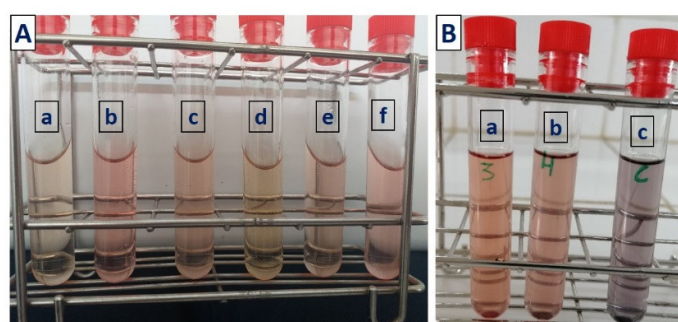

**Figure S2.** Indole-3-acetic acid (IAA) and siderophores production by representative antagonistic bacterial isolates. (A) IAA with a: B2-1, b: TM10, c: TG6, d: control with no bacteria, e: TG5 and f: TD7; (B) Siderophores with a: k4-4 and b: Bel3-4 and c: control with no bacteria.

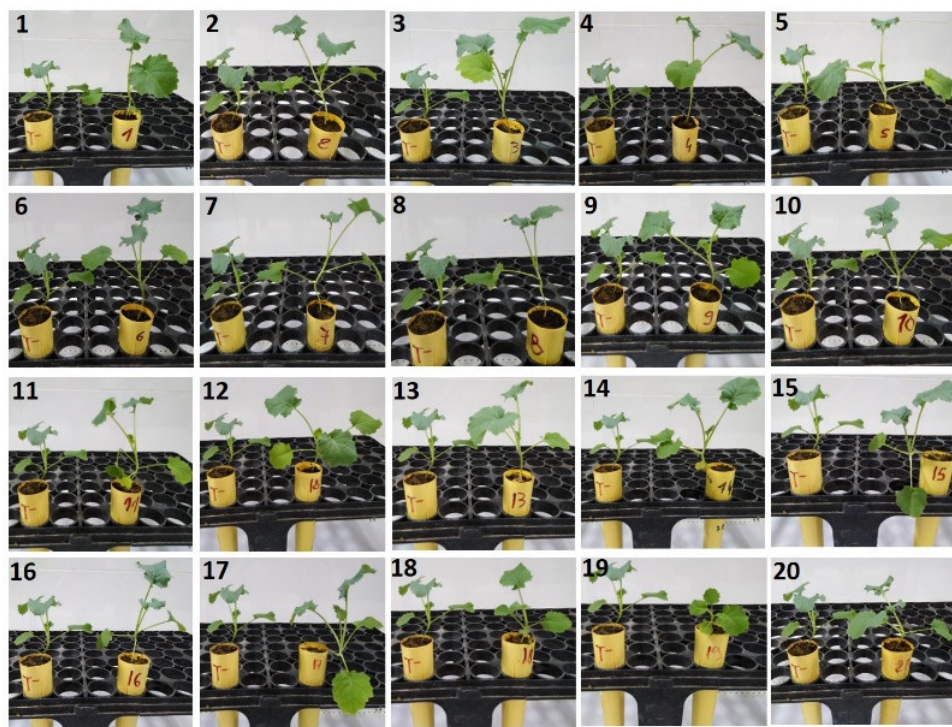

**Figure S3.** Effect of inoculation with rhizobacterial isolates (Right) on *Brassica napus* growth compared to control (Left), 30 days after sowing. 1 to 20: k3-7, k4-3, k4-4, Bel3-4, TD1, TD7, TG5, TG6, TM10, B2-1, BM1-3, BM3-2, BM3-4, BM3-5, BM4-1, BM4-3, GH1-1, GH1-2, GH1-5 and GH3-8 respectively.

**Table S1.** Oligonucleotide sequences of lipopeptides and bacteriocin genes

| Lipopeptides | Design Primer       | Primer sequence                                                              | Product length (bp) | Annealing T° | References |
|--------------|---------------------|------------------------------------------------------------------------------|---------------------|--------------|------------|
| Bacillomycin | Bacc1F<br>/Bacc1R   | GAAGGACACGGCAGAGAGTC/<br>CGCTGATGACTGTTCATGCT                                | 875 bp              | 60 °C        | [76]       |
| Fengycin     | Fend1F/<br>Fend1R   | TTTGGCAGCAGGAGAAGTT/<br>GCTGTCCGTTCTGCTTTTTC                                 | 964 bp              | 62 °C        | [76]       |
| Iturin       | Itup1F/<br>Ituo2R   | AGCTTAGGGAACAATT-<br>GTCATCGGGGCTTC/<br>TCAGATAGGCCGCCATATCG-<br>GAATGATTTCG | 2 kb                | 45 °C        | [77]       |
| Surfactin    | P17/<br>P18         | ATGAAGATTTACGGAATTTA/<br>TTATAAAAGCTCTTCGTACG                                | 675 bp              | 53 °C        | [78]       |
| Subtilosin   | OsboP1N/<br>OsboP2N | CCTCATGACCAG-<br>GACTTCGCCTT/<br>CGGTGCCGAGCGCTTCAGGT                        | 1200 bp             | 58 °C        | [79]       |
